# Supplementary material
Source: MDPI journal article supplement (https://www.mdpi.com/2073-4352/11/2/131)
Supplement: s1 [file s1]

Article

## Supplementary Material

Seong-Min Ji <sup>†</sup>, Seung-Won Oh <sup>†</sup>, and Tae-Hoon Yoon <sup>\*</sup>

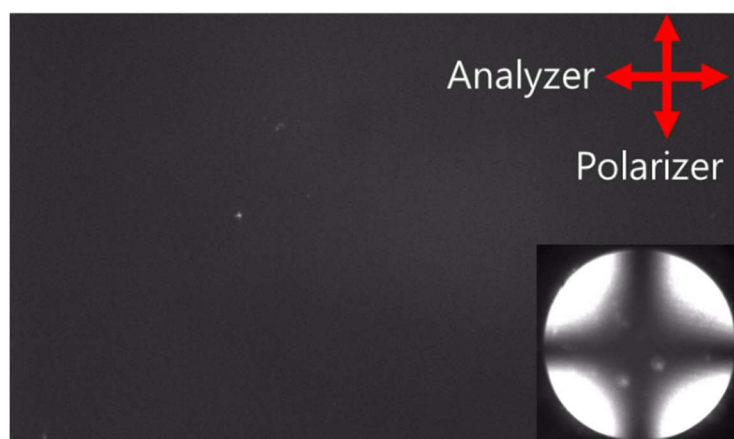

**Figure S1.** Polarized optical microscopy image and conoscope observation of fabricated GHLC cell.
